# Supplementary material for: Mobile Vaccination Teams for Improving Vaccination Coverage in the Kyrgyz Republic: Results of a National Health System-Strengthening Project during the First Two Years of the COVID-19 Pandemic
Source: MDPI journal article supplement (doi:10.3390/children10101681), 2023-10-12
Supplement: s1 [file s1]

## *Supplementary Materials*

### **Mobile Vaccination Teams for Improving Vaccination Coverage in the Kyrgyz Republic: Results of a National Health System-Strengthening Project during the First Two Years of the COVID-19 Pandemic**

**Table S1. Standards for Reporting Implementation Studies: the StaRI checklist**

The primary focus of implementation science is the implementation strategy (column 1) and the expectation is that this will always be completed.

The evidence about the impact of the intervention on the targeted population should always be considered (column 2) and either health outcomes reported or robust evidence cited to support a known beneficial effect of the intervention on the health of individuals or populations.

The StaRI standards refers to the broad range of study designs employed in implementation science. Authors should refer to other reporting standards for advice on reporting specific methodological features. Conversely, whilst all items are worthy of consideration, not all items will be applicable to, or feasible within every study.

| Checklist item       |   | Reported on page #                                                                | Implementation Strategy                                                                                                                                                                                                     | Reported on page #                                                                  | Intervention                                                                                                                                                               |
|----------------------|---|-----------------------------------------------------------------------------------|-----------------------------------------------------------------------------------------------------------------------------------------------------------------------------------------------------------------------------|-------------------------------------------------------------------------------------|----------------------------------------------------------------------------------------------------------------------------------------------------------------------------|
|                      |   | 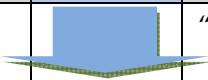 | “Implementation strategy” refers to how the intervention was implemented                                                                                                                                                    |  | “Intervention” refers to the healthcare or public health intervention that is being implemented.                                                                           |
| Title and abstract   |   |                                                                                   |                                                                                                                                                                                                                             |                                                                                     |                                                                                                                                                                            |
| Title                | 1 | 1                                                                                 | Identification as an implementation study, and description of the methodology in the title and/or keywords                                                                                                                  |                                                                                     |                                                                                                                                                                            |
| Abstract             | 2 | 1                                                                                 | Identification as an implementation study, including a description of the implementation strategy to be tested, the evidence-based intervention being implemented, and defining the key implementation and health outcomes. |                                                                                     |                                                                                                                                                                            |
| Introduction         |   |                                                                                   |                                                                                                                                                                                                                             |                                                                                     |                                                                                                                                                                            |
| Introduction         | 3 | 1-2                                                                               | Description of the problem, challenge or deficiency in healthcare or public health that the intervention being implemented aims to address.                                                                                 |                                                                                     |                                                                                                                                                                            |
| Rationale            | 4 | 1-2                                                                               | The scientific background and rationale for the implementation strategy (including any underpinning theory/framework/model, how it is expected to achieve its effects and any pilot work).                                  | 6                                                                                   | The scientific background and rationale for the intervention being implemented (including evidence about its effectiveness and how it is expected to achieve its effects). |
| Aims and objectives  | 5 | 2                                                                                 | The aims of the study, differentiating between implementation objectives and any intervention objectives.                                                                                                                   |                                                                                     |                                                                                                                                                                            |
| Methods: description |   |                                                                                   |                                                                                                                                                                                                                             |                                                                                     |                                                                                                                                                                            |
| Design               | 6 | 2                                                                                 | The design and key features of the evaluation, (cross referencing to any appropriate methodology reporting standards) and any                                                                                               |                                                                                     |                                                                                                                                                                            |

|                            |    |                 |                                                                                                                                                                                                   |                         |                                                                                                                                                       |
|----------------------------|----|-----------------|---------------------------------------------------------------------------------------------------------------------------------------------------------------------------------------------------|-------------------------|-------------------------------------------------------------------------------------------------------------------------------------------------------|
|                            |    |                 | changes to study protocol, with reasons                                                                                                                                                           |                         |                                                                                                                                                       |
| Context                    | 7  | 3               | The context in which the intervention was implemented. (Consider social, economic, policy, healthcare, organisational barriers and facilitators that might influence implementation elsewhere).   |                         |                                                                                                                                                       |
| Targeted ‘sites’           | 8  | 3               | The characteristics of the targeted ‘site(s)’ (e.g locations/personnel/resources etc.) for implementation and any eligibility criteria.                                                           | 8, <b>Supp table S2</b> | The population targeted by the intervention and any eligibility criteria.                                                                             |
| Description                | 9  | 3               | A description of the implementation strategy                                                                                                                                                      | 6                       | A description of the intervention                                                                                                                     |
| Sub-groups                 | 10 | NA              | Any sub-groups recruited for additional research tasks, and/or nested studies are described                                                                                                       |                         |                                                                                                                                                       |
| <b>Methods: evaluation</b> |    |                 |                                                                                                                                                                                                   |                         |                                                                                                                                                       |
| Outcomes                   | 11 | 4               | Defined pre-specified primary and other outcome(s) of the implementation strategy, and how they were assessed. Document any pre-determined targets                                                | <b>Supp table S7</b>    | Defined pre-specified primary and other outcome(s) of the intervention (if assessed), and how they were assessed. Document any pre-determined targets |
| Process evaluation         | 12 | <b>Table S4</b> | Process evaluation objectives and outcomes related to the mechanism by which the strategy is expected to work                                                                                     |                         |                                                                                                                                                       |
| Economic evaluation        | 13 | NA              | Methods for resource use, costs, economic outcomes and analysis for the implementation strategy                                                                                                   | NA                      | Methods for resource use, costs, economic outcomes and analysis for the intervention                                                                  |
| Sample size                | 14 | NA              | Rationale for sample sizes (including sample size calculations, budgetary constraints, practical considerations, data saturation, as appropriate)                                                 |                         |                                                                                                                                                       |
| Analysis                   | 15 | 4               | Methods of analysis (with reasons for that choice)                                                                                                                                                |                         |                                                                                                                                                       |
| Sub-group analyses         | 16 | NA              | Any a priori sub-group analyses (e.g., between different sites in a multicentre study, different clinical or demographic populations), and sub-groups recruited to specific nested research tasks |                         |                                                                                                                                                       |

**Table S2. Vaccination schedule in Kyrgyzstan**

| Birth | 2m                   | 3m                              | 5m                   | 9m  | 12m   | 24m | 6 y | 11 y                       | 16 y | 26y | 36 y | 46 y | 56 y |
|-------|----------------------|---------------------------------|----------------------|-----|-------|-----|-----|----------------------------|------|-----|------|------|------|
| HepB  | DTP-<br>Hib-<br>HepB | 3,5 m -<br>DTP-<br>Hib-<br>HepB | DTP-<br>Hib-<br>HepB | IPV | MMR   | DPT | DT  | Td                         | Td   | Td  | Td   | Td   | Td   |
| BCG   | PCV13                | IPV                             | PCV13                |     | PCV13 |     | MMR | HPV<br>(girls, 2<br>times) |      |     |      |      |      |
|       | OPV                  | OPV                             | OPV                  |     |       |     |     |                            |      |     |      |      |      |
|       | RV-5                 | RV-5                            | RV-5                 |     |       |     |     |                            |      |     |      |      |      |

Abbreviations: BCG= antituberculois vaccine; DTP = difteria, tetanus, pertussis vaccine; IPV = inactivated polio vaccine; HepB= hepatitis B vaccine; Hib= Heamophilus Influentiae Type B; HPV= Human papilloma Virus; MMR = measles, mups, rubella vaccine; OPV = oral Polio vaccine; Penta = pentavalent vaccine; PCV13 = Pneumococcal 13 valent vaccine; RV-5 = rotavirus 5-valent vaccine; Td = tetanus difteria vaccine

**Table S3. List of settlements covered by MVTs**

| District            | Name of settlements                   |
|---------------------|---------------------------------------|
| <b>Bishkek City</b> |                                       |
| Leninskii           | Tynchtyk                              |
|                     | Zher-Yntymagy                         |
| Octyabrskii         | Altyn- Ordo                           |
| Sverdlovskii        | Dordoi                                |
|                     | Ak-Jar                                |
| Pervomayskii        | Kalys-Ordo                            |
| <b>Osh City</b>     |                                       |
|                     | Turan                                 |
|                     | Kulatova                              |
|                     | Manas- Ata                            |
|                     | Alymbek Datka, Territorial Council №7 |
|                     | Amur-Timur                            |
| <b>Chui region</b>  |                                       |
| Moskovskii          | Predtechenko                          |
|                     | Besh -Terek                           |
|                     | Malovodnoe                            |
|                     | Tolok                                 |
|                     | Kyz-Molo                              |
| Issyk-Atinskii      | Almaluu                               |
|                     | Yuch-Emchek                           |
|                     | Norus                                 |
|                     | Toguz-Bulak                           |
|                     | Karagai- Bulak                        |
|                     | Ichke-Suu                             |
|                     | RotFront                              |
|                     | Ak- Sai                               |
|                     | Telman                                |
|                     | Otogon                                |
| Jailskii            | Suusamyr                              |
|                     | Transparent                           |
|                     | Birinchii (1) May                     |
|                     | Kojomkul                              |
|                     | Kyzyloi                               |
|                     | Stepnoye                              |
|                     | Kaldyk                                |
|                     | Moltovar                              |
| Sokulukskii         | Ak- Ordo                              |
|                     | Ata-Jurt                              |
|                     | Tynchtyk                              |
|                     | Erkin-Too , Pole-Chudes               |
|                     |                                       |
|                     | Kudaibergen                           |
|                     | Akyl-Ordo contour-498, 509, 511       |
|                     | Altyn- Ordo                           |
|                     | Ak- Ordo 3 ThES                       |
|                     | Mirnoye                               |

|                         |                              |
|-------------------------|------------------------------|
|                         | Jany Turmush                 |
|                         | Dacha- Suu                   |
| Alamudunskii            | Octyabrskoye                 |
|                         | Prigorodnoye                 |
| Keminskii               | Shabdan                      |
|                         | Orlovka                      |
|                         | Kemin                        |
| Panfilovskii            | Pervomaiskoye                |
|                         | Octobrskoye                  |
|                         | Rovnoye                      |
|                         | Chorgolo                     |
| Chuiskii                | Arpatector                   |
|                         | Sovietskoye                  |
|                         | Kegeti                       |
|                         | Shamsi                       |
|                         | Koshoi                       |
|                         | On-Bir-Jylga                 |
|                         | Madaniyat                    |
|                         | Kosh- Korgon                 |
| <b>Issyk-Kul region</b> |                              |
| Ak-Suiskii              | Ak- Bulak                    |
|                         | Ak- Bulun                    |
|                         | Zyndan (Toktogul)            |
|                         | Tyurgen                      |
|                         | Ak-Chii                      |
|                         | Kyzyl - Kiya (Sovietskoye)   |
|                         | Kachybek                     |
|                         | Boz-Uchuk (Novovoznesenovka) |
|                         | Enchilesh ( Boz-Uchuk )      |
|                         | Ichke-Jergez                 |
|                         | Otradnoye                    |
|                         | Shapak                       |
|                         | Jyrgalan                     |
|                         | Altyn- Arashan               |
|                         | Enilchek                     |
|                         | Kok- Zhaiyk                  |
|                         | Kok- Kiya                    |
|                         | Ken-Suu                      |
|                         | Koiluu                       |
|                         | Kurgak                       |
| Jeti-Oguzskii           | Ak-Shyirak                   |
|                         | Uch-Koshkon                  |
|                         | Pogran Zastava               |
|                         | Pickertick, Yshtyk           |
|                         | Karakol                      |
|                         | Kara- Sai                    |
|                         | Jeti –Oguz Resort            |
|                         | Taldy-Bulak                  |
|                         | Podgornoye                   |
|                         | Jyluu- Chuu, Juuk            |
|                         | Koi-Sary                     |

|                          |                             |
|--------------------------|-----------------------------|
|                          | Zelenyi Gai                 |
|                          | Dachi                       |
|                          | Pristan, Kainar, Sanatorium |
| Tonskii                  | Ala-Bash                    |
|                          | Chetindi                    |
|                          | Kalgar                      |
|                          | Archaly                     |
|                          | Korgonyu Bulak              |
|                          | Tuura-Suu 2                 |
| Tyupskii                 | Farm №4 - Karkyra           |
|                          | Farm №3 - Santash           |
|                          | Chaar-Kuduk                 |
|                          | Chon –Bet                   |
|                          | Sary- Tologoy               |
|                          | Ken-Suu                     |
|                          | Tabylgyty                   |
|                          | Tasma                       |
|                          | Chon-Toguzbay               |
|                          | Toktoyan                    |
|                          | Mayak                       |
|                          | Yntymak                     |
| Issyk-Kulskii            | Chet- Baisoorun             |
|                          | Kok- Dobo                   |
|                          | Chon-Oruktu                 |
| <b>Naryn region</b>      |                             |
| At-Bashinskii            | Ak-Muz                      |
|                          | Ak-Moyun                    |
|                          | Ak-Sai Valley               |
|                          | Kazybek                     |
|                          | Kara-Suu                    |
|                          | Ak-Jar                      |
| Ak-Talinskii             | Ak- Moynok                  |
|                          | Darbaza                     |
|                          | Arpa                        |
| Kochkorskii              | Ak-Kaptal                   |
|                          | Iti-Suu                     |
|                          | Karakol                     |
|                          | Sook                        |
|                          | Kalmak -Ashu                |
|                          | Tyndyuk                     |
| Jumgalskii               | Sary-Kamysh                 |
| Narynskii                | Karatal- Zhanyryk           |
|                          | Jer-Kochku                  |
|                          | Kara-Jylga                  |
|                          | Ak-Kuduk                    |
|                          | Kok- Kiya                   |
|                          | Eki -Naryn                  |
|                          | Jylan-Aryk                  |
| <b>Jalal-Abad region</b> |                             |
| Aksyiskii                | Jolbostu                    |
|                          | Kechuu                      |

|                   |                       |
|-------------------|-----------------------|
|                   | Ak- Sai               |
|                   | Tash-Kuduk            |
| Ala- Bukinskii    | Chon-Sai              |
|                   | Ak- Bashat            |
|                   | Jetitam               |
| Bazar- Korgonskii | Kyzyl -Unkur          |
|                   | Kok- Tondy            |
| Nookenskii        | Toktonbai             |
|                   | Shyngyma              |
|                   | ApyrtaAdyrn           |
| Suzakskii         | Jashasyn              |
|                   | Aral                  |
|                   | Kamysh-Bashy          |
|                   | Askar- Ata            |
|                   | Ortok                 |
| Toktogulskii      | Buurkan               |
|                   | Kushchu- Suu          |
|                   | Kotormo               |
| Toguz-Toruskii    | Makmal                |
|                   | Ornok                 |
|                   | Kosh-Bulak            |
|                   | Karl Marx             |
|                   | Dodomol               |
| Chatkalskii       | Ayakky- Terek         |
|                   | Myrza-Bulak           |
|                   | Shamaldy-Sai          |
| Jalal-Abadskii    | Ak-Suu                |
| <b>Osh region</b> |                       |
| Kara –Suuskii     | Chaichi               |
|                   | Alp-Ordo              |
|                   | Ak-Terek              |
|                   | Dostuk                |
|                   | Langar                |
|                   | Taldyk                |
|                   | Teeke                 |
| Kara -Kulzhinskii | Kyzyl-Zhar            |
|                   | Kara -Guz             |
|                   | Ylai – Talaa          |
| Nookatskii        | Kashka- Suu           |
|                   | Kayindy               |
|                   | Kara- Bulak           |
|                   | Kotur-Bulak           |
|                   | Dary – Suu            |
|                   | Ak-Terek              |
|                   | Kapka                 |
|                   | Kara-Koi              |
|                   | Budaylyk-Chon-Kyshtoo |
|                   | Kapchygai             |
|                   | Syrt- Kyrkol          |
| Aravanskii        | Chogom                |
|                   | Kichik-Alai           |



|                      |               |
|----------------------|---------------|
|                      | Kara- Bulak   |
|                      | Too-Moyun     |
| <b>Talas region</b>  |               |
| Talas                | Jegre - Tal   |
|                      | Ken-Kol       |
|                      | Besh-Tash     |
|                      | Kopuro -Bazar |
| Bakai-Atinskii       | Kara-Koyun    |
| Manasskii            | Echkilik      |
| <b>Batken region</b> |               |
| Kadamjay             |               |
| Leylek               |               |
| Batken               |               |

**Table S4. Rounds of vaccinations performed by MVTs**

|             | <b>Rounds</b>       | <b>Dates</b>       |
|-------------|---------------------|--------------------|
| <b>2020</b> |                     |                    |
| 1           | <b>First round</b>  | April and May 2020 |
| 2           | <b>Second round</b> | July 2020          |
| 3           | <b>Third round</b>  | August 2020        |
| 4           | <b>Fourth round</b> | September 2020     |
| 5           | <b>Fifth round</b>  | Novembre 2020      |
| 6           | <b>Sixth round</b>  | Décembre 2020      |
| <b>2021</b> |                     |                    |
| 1           | <b>First round</b>  | March 2021         |
| 2           | <b>Second round</b> | June 2021          |
| 3           | <b>Third round</b>  | June 2021          |
| 4           | <b>Fourth round</b> | August 2021        |
| 5           | <b>Fifth round</b>  | October 2021       |
| 6           | <b>Sixth round</b>  | November 2021      |

**Table S5. Coverage of hard-to-reach settlements by regions and MVTs rounds (2021)**

| No. | Region/City       | Round 1 | Round 2 | Round 3 | Round 4 | Round 5 | Round 6 |
|-----|-------------------|---------|---------|---------|---------|---------|---------|
| 1   | Bishkek           | 68.8%   | 70%     | 85%     | 94%     | 99%     | 99%     |
| 2   | Osh               | 80%     | 80%     | 78.9%   | 85.8%   | 95.7%   | 86%     |
| 3   | Chui region       | 100%    | 100%    | 100%    | 100%    | 100%    | 100%    |
| 4   | Issyk-Kul region  | 73%     | 73%     | 73%     | 73%     | 73%     | 78%     |
| 5   | Naryn region      | 60%     | 38.2%   | 38.2%   | 40.2%   | 47.3%   | 65.2%   |
| 6   | Jalal-Abad region | 58%     | 78%     | 79%     | 89%     | 55%     | 30%     |
| 7   | Osh region        | 56%     | 47%     | 54%     | 50.1%   | 52.8%   | 88%     |
| 8   | Talas region      | 100%    | 100%    | 100%    | 100%    | 100%    | 100%    |
| 9   | Batken region     | 80%     | 70%     | 70%     | 90%     | 100%    | 59%     |

**Table S6. Number of people vaccinated, by vaccine, year 2020**

| <b>Vaccinations</b>          | <b>Batken<br/>region</b> | <b>Naryn<br/>region</b> | <b>Jalal-<br/>Abad</b> | <b>Chui<br/>region</b> | <b>Issyk-<br/>Kul</b> | <b>Talas<br/>region</b> | <b>Bishkek<br/>city</b> | <b>Osh city</b> | <b>Osh<br/>region</b> | <b>Total</b> |
|------------------------------|--------------------------|-------------------------|------------------------|------------------------|-----------------------|-------------------------|-------------------------|-----------------|-----------------------|--------------|
| bOPV - 1 (oral polio)        | 432                      | 425                     | 1529                   | 1445                   | 560                   | 451                     | 580                     | 402             | 1111                  | 6935         |
| bOPV - 2 (oral polio)        | 363                      | 375                     | 1298                   | 900                    | 573                   | 492                     | 638                     | 346             | 907                   | 5892         |
| bOPV - 3 (oral polio)        | 312                      | 357                     | 1509                   | 1137                   | 573                   | 493                     | 582                     | 328             | 969                   | 6260         |
| <b>Total</b>                 | 1107                     | 1157                    | 4336                   | 3482                   | 1706                  | 1436                    | 1800                    | 1076            | 2987                  | 19087        |
| IPV (inactivated polio)      | 447                      | 288                     | 1296                   | 1132                   | 541                   | 487                     | 577                     | 326             | 888                   | 5982         |
| Penta - 1 (DTP-HBV-<br>Hib ) | 538                      | 417                     | 1539                   | 1331                   | 573                   | 443                     | 760                     | 400             | 1111                  | 7112         |
| Penta - 2 (DTP-HBV-<br>Hib ) | 472                      | 385                     | 1309                   | 861                    | 581                   | 483                     | 586                     | 346             | 896                   | 5919         |
| Penta - 3 (DTP-HBV-<br>Hib ) | 422                      | 401                     | 1477                   | 1040                   | 551                   | 475                     | 566                     | 328             | 975                   | 6235         |
| <b>Total</b>                 | 1432                     | 1203                    | 4325                   | 3232                   | 1705                  | 1401                    | 1912                    | 1074            | 2982                  | 19266        |
| RV-1                         | 515                      | 344                     | 1462                   | 1185                   | 553                   | 418                     | 510                     | 382             | 1099                  | 6468         |
| RV-2                         | 448                      | 333                     | 1248                   | 815                    | 539                   | 464                     | 669                     | 388             | 875                   | 5779         |
| RV-3                         | 364                      | 282                     | 1289                   | 1072                   | 583                   | 456                     | 498                     | 256             | 993                   | 5793         |
| <b>Total</b>                 | 1327                     | 959                     | 3999                   | 3072                   | 1675                  | 1338                    | 1677                    | 1026            | 2967                  | 18040        |
| MMR at 1 year                | 483                      | 639                     | 1310                   | 1590                   | 1000                  | 555                     | 875                     | 388             | 925                   | 7765         |
| MMR at 6 years               | 351                      | 685                     | 892                    | 1261                   | 842                   | 808                     | 580                     | 302             | 1134                  | 6855         |
| <b>Total</b>                 | 834                      | 1324                    | 2202                   | 2851                   | 1842                  | 1363                    | 1455                    | 690             | 2059                  | 14620        |
| PCV - 1<br>(Pneumococcal)    | 537                      | 420                     | 1490                   | 1235                   | 573                   | 441                     | 559                     | 392             | 1093                  | 6740         |
| PCV - 2<br>(Pneumococcal)    | 431                      | 391                     | 1460                   | 985                    | 570                   | 473                     | 532                     | 322             | 893                   | 6057         |
| PCV - 3<br>(Pneumococcal)    | 491                      | 608                     | 1379                   | 1578                   | 742                   | 560                     | 832                     | 396             | 960                   | 7546         |
| <b>Total</b>                 | 1459                     | 1419                    | 4329                   | 3798                   | 1885                  | 1474                    | 1923                    | 1110            | 2946                  | 20343        |
| DPT-2 years                  | 477                      | 780                     | 952                    | 1303                   | 786                   | 431                     | 861                     | 560             | 992                   | 7142         |
| Dt- 6 years                  | 302                      | 730                     | 1117                   | 1355                   | 812                   | 810                     | 551                     | 302             | 1134                  | 7113         |
| <b>Total</b>                 | 687                      | 1331                    | 1915                   | 2219                   | 1503                  | 1241                    | 1375                    | 862             | 2126                  | 13259        |

|                                          |               |      |      |      |      |      |      |      |        |       |
|------------------------------------------|---------------|------|------|------|------|------|------|------|--------|-------|
| Td - 11 years                            | 624           | 703  | 748  | 2609 | 846  | 863  | 83   | 778  | 1020   | 8274  |
| Td- 16 years                             | 504           | 553  | 733  | 1758 | 507  | 475  | 125  | 472  | 1291   | 6418  |
| Td -26 years                             | 269           | 364  | 548  | 1005 | 529  | 369  | 480  | 550  | 1327   | 5441  |
| Td- 36 years                             | 249           | 345  | 373  | 973  | 371  | 321  | 566  | 530  | 1141   | 4869  |
| Td- 46 years                             | 185           | 269  | 408  | 757  | 377  | 324  | 356  | 408  | 909    | 3993  |
| Td- 56 years                             | 279           | 576  | 578  | 969  | 522  | 230  | 232  | 368  | 892    | 4646  |
| <b>Total</b>                             | 13476         | 3337 | 4827 | 9370 | 4223 | 3823 | 3151 | 3968 | 8706   | 54881 |
| Number of mobile teams involved          | 5             | 6    | ten  | ten  | 5    | 5    | 7    | 5    | eleven | 64    |
| Total vaccinations given in the Republic | <b>165478</b> |      |      |      |      |      |      |      |        |       |
| <b>Children under 1</b>                  | <b>90483</b>  |      |      |      |      |      |      |      |        |       |
| <b>Children under 16</b>                 | <b>125289</b> |      |      |      |      |      |      |      |        |       |
| Adults                                   | <b>18949</b>  |      |      |      |      |      |      |      |        |       |

Abbreviations: DTP= difteria, tetanus, pertussis vaccine; IPV= inactivated polio vaccin; MMR=measles, mups, rubella vaccine; OPV= oral Polio vaccine; Penta= pentavalent vaccine; PCV= Pneumococcal vaccine; RV=rotavirus vaccine ;Td= tetanus difteria vaccine

Table S7. Number of people vaccinated, by vaccine, year 2021

| Vaccinations            | Batken region | Naryn region | Jalal-Abad region | Chui region | Issyk-Kul region | Talas region | Bishkek city | Osh city | Osh region | Total |
|-------------------------|---------------|--------------|-------------------|-------------|------------------|--------------|--------------|----------|------------|-------|
| bOPV - 1 (oral polio)   | 494           | 555          | 1139              | 1664        | 627              | 340          | 854          | 656      | 1966       | 8295  |
| bOPV - 2 (oral polio)   | 436           | 473          | 939               | 1478        | 509              | 439          | 928          | 619      | 1780       | 7601  |
| bOPV - 3 (oral polio)   | 356           | 494          | 1044              | 1900        | 483              | 384          | 1031         | 556      | 1749       | 7997  |
| <b>Total</b>            | 1286          | 1522         | 3122              | 5042        | 1619             | 1163         | 2813         | 1831     | 5495       | 23893 |
| IPV (inactivated polio) | 1171          | 454          | 1078              | 4945        | 531              | 513          | 1145         | 1442     | 1721       | 13000 |
| Penta - 1 (DTP-VGV-Hib) | 490           | 560          | 1982              | 1549        | 608              | 340          | 827          | 660      | 1971       | 8987  |
| Penta - 2 (DTP-VGV-Hib) | 436           | 467          | 932               | 1396        | 494              | 428          | 890          | 574      | 1791       | 7408  |
| Penta - 3 (DTP-VGV-Hib) | 418           | 500          | 1814              | 1926        | 464              | 357          | 893          | 550      | 1770       | 8692  |
| <b>Total</b>            | 1344          | 1527         | 4728              | 4871        | 1566             | 1125         | 2610         | 1784     | 5532       | 25087 |
| RV-1                    | 474           | 502          | 1072              | 1306        | 611              | 316          | 852          | 647      | 1927       | 7707  |
| RV-2                    | 427           | 465          | 929               | 929         | 507              | 408          | 891          | 590      | 1746       | 6892  |
| RV-3                    | 409           | 495          | 1057              | 1178        | 477              | 324          | 899          | 449      | 1537       | 6825  |
| <b>Total</b>            | 1310          | 1462         | 3058              | 3413        | 1595             | 1048         | 2642         | 1686     | 5210       | 21424 |
| MMR at 1 year           | 569           | 632          | 1896              | 1857        | 856              | 986          | 927          | 646      | 1853       | 10222 |
| MMR at 6 years          | 519           | 661          | 899               | 1757        | 690              | 1177         | 740          | 405      | 1847       | 8695  |
| <b>Total</b>            | 1088          | 1293         | 2795              | 3614        | 1546             | 2163         | 1667         | 1051     | 3700       | 18917 |
| PCV - 1 (Pneumococcal)  | 502           | 489          | 1175              | 1738        | 615              | 337          | 853          | 649      | 1953       | 8311  |
| PCV - 2 (Pneumococcal)  | 451           | 481          | 1149              | 1828        | 461              | 362          | 881          | 555      | 1767       | 7935  |
| PCV - 3 (Pneumococcal)  | 523           | 620          | 1100              | 2188        | 724              | 979          | 943          | 789      | 1751       | 9617  |
| <b>Total</b>            | 1476          | 1590         | 3424              | 5754        | 1800             | 1678         | 2677         | 1993     | 5471       | 25863 |
| DPT-2 years             | 555           | 713          | 912               | 1421        | 621              | 367          | 1072         | 611      | 1882       | 8154  |
| Dt- 6 years             | 517           | 638          | 905               | 1682        | 641              | 1170         | 919          | 398      | 1868       | 8738  |
| <b>Total</b>            | 1072          | 1351         | 1817              | 3103        | 1262             | 1537         | 1991         | 1009     | 3750       | 16892 |
| Td- 11 years            | 345           | 517          | 672               | 2779        | 468              | 484          | 482          | 286      | 1258       | 7291  |

|                                    |               |      |      |      |      |      |      |      |      |       |
|------------------------------------|---------------|------|------|------|------|------|------|------|------|-------|
| <b>Td- 16 years</b>                | 297           | 496  | 557  | 2231 | 302  | 365  | 266  | 265  | 901  | 5680  |
| <b>Td - 26 years</b>               | 163           | 225  | 538  | 928  | 148  | 333  | 662  | 391  | 558  | 3946  |
| <b>Td- 36 years</b>                | 163           | 216  | 394  | 862  | 151  | 275  | 687  | 343  | 536  | 3627  |
| <b>Td - 46 years</b>               | 102           | 224  | 361  | 833  | 134  | 292  | 487  | 286  | 399  | 3118  |
| <b>Td - 56 years</b>               | 96            | 229  | 329  | 607  | 118  | 200  | 280  | 201  | 363  | 2423  |
| <b>Total</b>                       | 1166          | 1907 | 2851 | 8240 | 1321 | 1949 | 2864 | 1772 | 4015 | 26085 |
| Number of mobile teams involved    | 5             | 7    | 10   | 10   | 6    | 5    | 14   | 9    | 12   | 78    |
| Total vaccinations in the Republic | 171161        |      |      |      |      |      |      |      |      |       |
| <b>Children under 1</b>            | <b>109267</b> |      |      |      |      |      |      |      |      |       |
| <b>Children under 16</b>           | <b>158047</b> |      |      |      |      |      |      |      |      |       |
| Adults                             | <b>13,114</b> |      |      |      |      |      |      |      |      |       |

Abbreviations: DTP= difteria, tetanus, pertussis vaccine; IPV= inactivated polio vaccin; MMR=measles, mups, rubella vaccine; OPV= oral Polio vaccine; Penta= pentavalent vaccine; PCV= Pneumococcal vaccine; RV=rotavirus vaccine ;Td= tetanus difteria vaccine

**Table S8. Contribute of MVTs to the total immunization coverage in the country (2021)**

| <b>Vaccination</b>               | <b>Batken<br/>region</b> | <b>Naryn<br/>region</b> | <b>Jalal-<br/>Abad</b> | <b>Chui<br/>region</b> | <b>Issyk-Kul<br/>region</b> | <b>Talas<br/>region</b> | <b>Bishkek<br/>city</b> | <b>Osh city</b> | <b>Osh<br/>region</b> | <b>Total</b> |
|----------------------------------|--------------------------|-------------------------|------------------------|------------------------|-----------------------------|-------------------------|-------------------------|-----------------|-----------------------|--------------|
| <b>bOPV - 3 (oral polio)</b>     | 2.7%                     | 9.2%                    | 3.5%                   | 9.4%                   | 5.4%                        | 7.6%                    | 4.5%                    | 6.5%            | 5.5%                  | 5.5%         |
| <b>IPV (inactivated polio)</b>   | 9.0%                     | 8.5%                    | 3.7%                   | 24.4%                  | 5.9%                        | 10.1%                   | 5.0%                    | 16.9%           | 5.4%                  | 8.9%         |
| <b>Penta - 3 (DTP- HBV -Hib)</b> | 6.5%                     | 1.5%                    | 0.0%                   | 4.0%                   | 1.0%                        | 3.2%                    | 0.2%                    | 1.0%            | 1.1%                  | 1.7%         |
| <b>RV-3</b>                      | 3.1%                     | 9.2%                    | 3.6%                   | 5.8%                   | 5.3%                        | 6.4%                    | 3.9%                    | 5.3%            | 4.8%                  | 4.7%         |
| <b>MMR at 1 year of age</b>      | 4.4%                     | 11.8%                   | 6.4%                   | 9.2%                   | 9.6%                        | 19.5%                   | 4.0%                    | 7.6%            | 5.8%                  | 7.0%         |
| <b>MMR at 6 years</b>            | 3.7%                     | 11.3%                   | 3.1%                   | 7.7%                   | 6.9%                        | 21.3%                   | 3.8%                    | 4.5%            | 5.6%                  | 5.8%         |
| <b>PCV - 3 (Pneumococcal)</b>    | 4.0%                     | 11.5%                   | 3.7%                   | 10.8%                  | 8.1%                        | 19.3%                   | 4.1%                    | 9.2%            | 5.5%                  | 6.6%         |
| <b>DPT-2 years</b>               | 4.0%                     | 12.9%                   | 3.1%                   | 6.4%                   | 6.3%                        | 6.9%                    | 4.6%                    | 6.6%            | 5.5%                  | 5.3%         |
| <b>DT- 6 years</b>               | 3.6%                     | 10.9%                   | 3.1%                   | 7.4%                   | 6.4%                        | 21.2%                   | 4.7%                    | 4.4%            | 5.6%                  | 5.8%         |
| <b>Td- 11 years</b>              | 2.9%                     | 9.0%                    | 2.6%                   | 13.4%                  | 4.6%                        | 8.6%                    | 2.4%                    | 3.8%            | 4.5%                  | 5.4%         |
| <b>Td - 16 years</b>             | 3.4%                     | 10.0%                   | 2.8%                   | 14.2%                  | 3.7%                        | 8.3%                    | 1.7%                    | 5.0%            | 4.3%                  | 5.5%         |
| <b>Td - 26 years</b>             | 1.8%                     | 7.2%                    | 2.8%                   | 6.7%                   | 2.4%                        | 10.3%                   | 6.0%                    | 6.7%            | 2.7%                  | 4.3%         |
| <b>Td - 36 years</b>             | 2.1%                     | 7.5%                    | 2.5%                   | 6.3%                   | 2.7%                        | 10.0%                   | 6.4%                    | 7.3%            | 3.2%                  | 4.5%         |
| <b>Td- 46 years</b>              | 2.0%                     | 8.8%                    | 3.2%                   | 7.8%                   | 3.0%                        | 13.1%                   | 5.5%                    | 8.5%            | 3.1%                  | 5.1%         |
| <b>Td - 56 years</b>             | 2.2%                     | 10.4%                   | 3.4%                   | 5.9%                   | 2.8%                        | 11.1%                   | 4.2%                    | 6.8%            | 3.1%                  | 4.5%         |

Abbreviations: DTP= difteria, tetanus, pertussis vaccine; IPV= inactivated polio vaccin; MMR=measles, mups, rubella vaccine; OPV= oral Polio vaccine; Penta= pentavalent vaccine; PCV= Pneumococcal vaccine; RV=rotavirus vaccine ;Td= tetanus difteria vaccine
